# Supplementary material for: Genome Majority Vote Improves Gene Predictions
Source: PLOS journal article supplement (doi:10.1371/journal.pcbi.1002284), 2011-11-17
Supplement: S4 (10.1371/journal.pcbi.1002284.s004) [file journal.pcbi.1002284.s004]

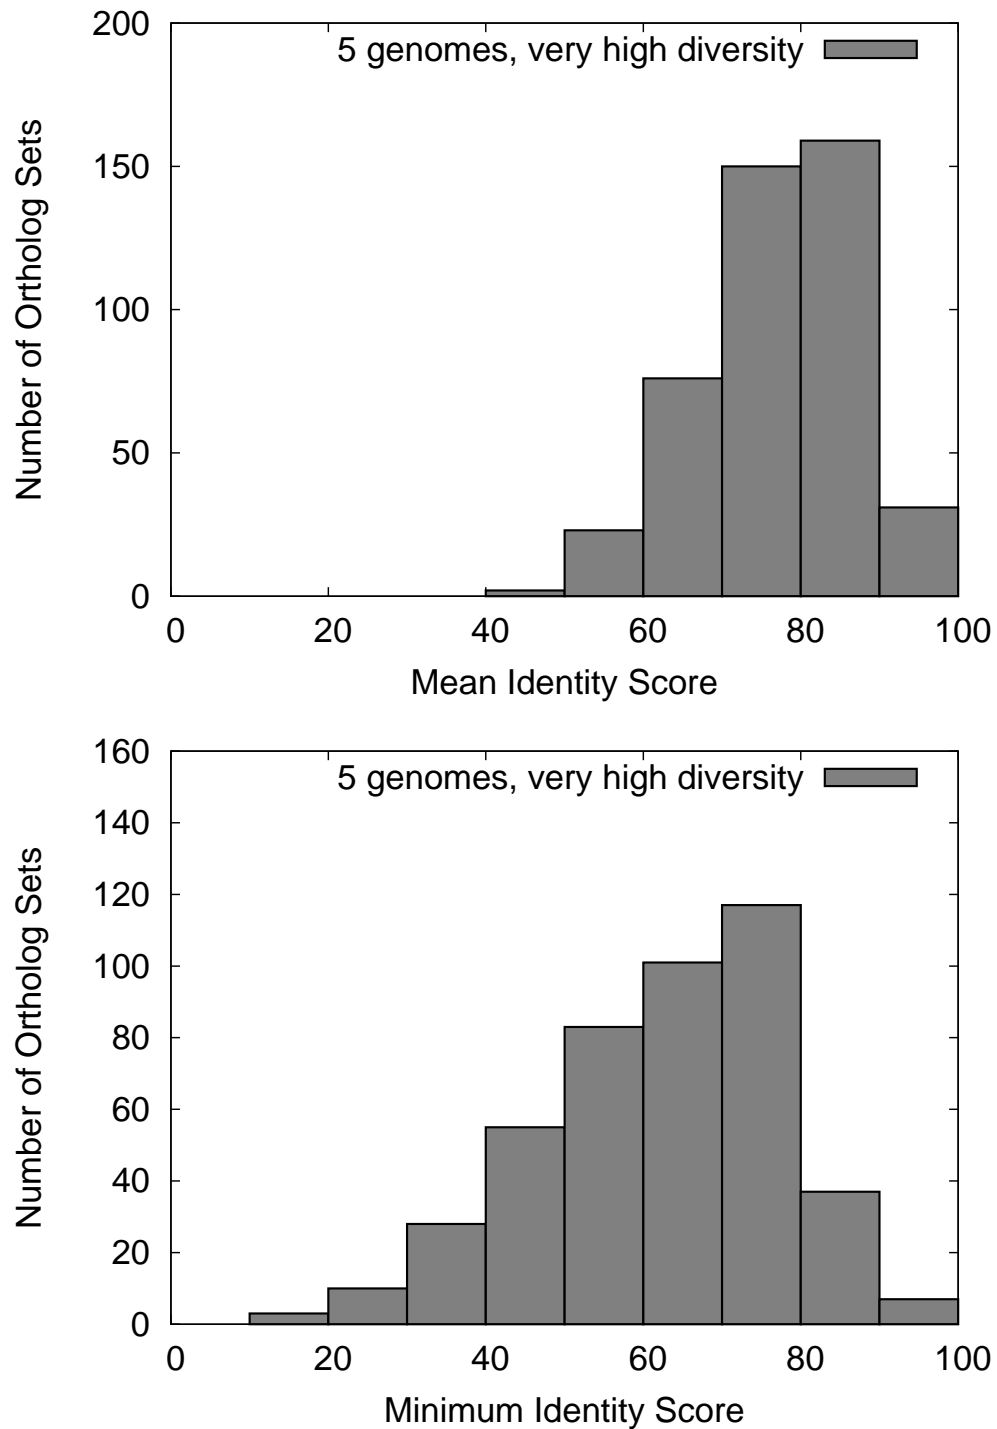

Figure S4: Histogram of mean (top) and minimum (bottom) identity score between genes in ortholog sets derived from the very high diversity, 5 genome set.
