# Supplementary material for: Genome Majority Vote Improves Gene Predictions
Source: PLOS journal article supplement (doi:10.1371/journal.pcbi.1002284), 2011-11-17
Supplement: S8 (10.1371/journal.pcbi.1002284.s008) [file journal.pcbi.1002284.s008]

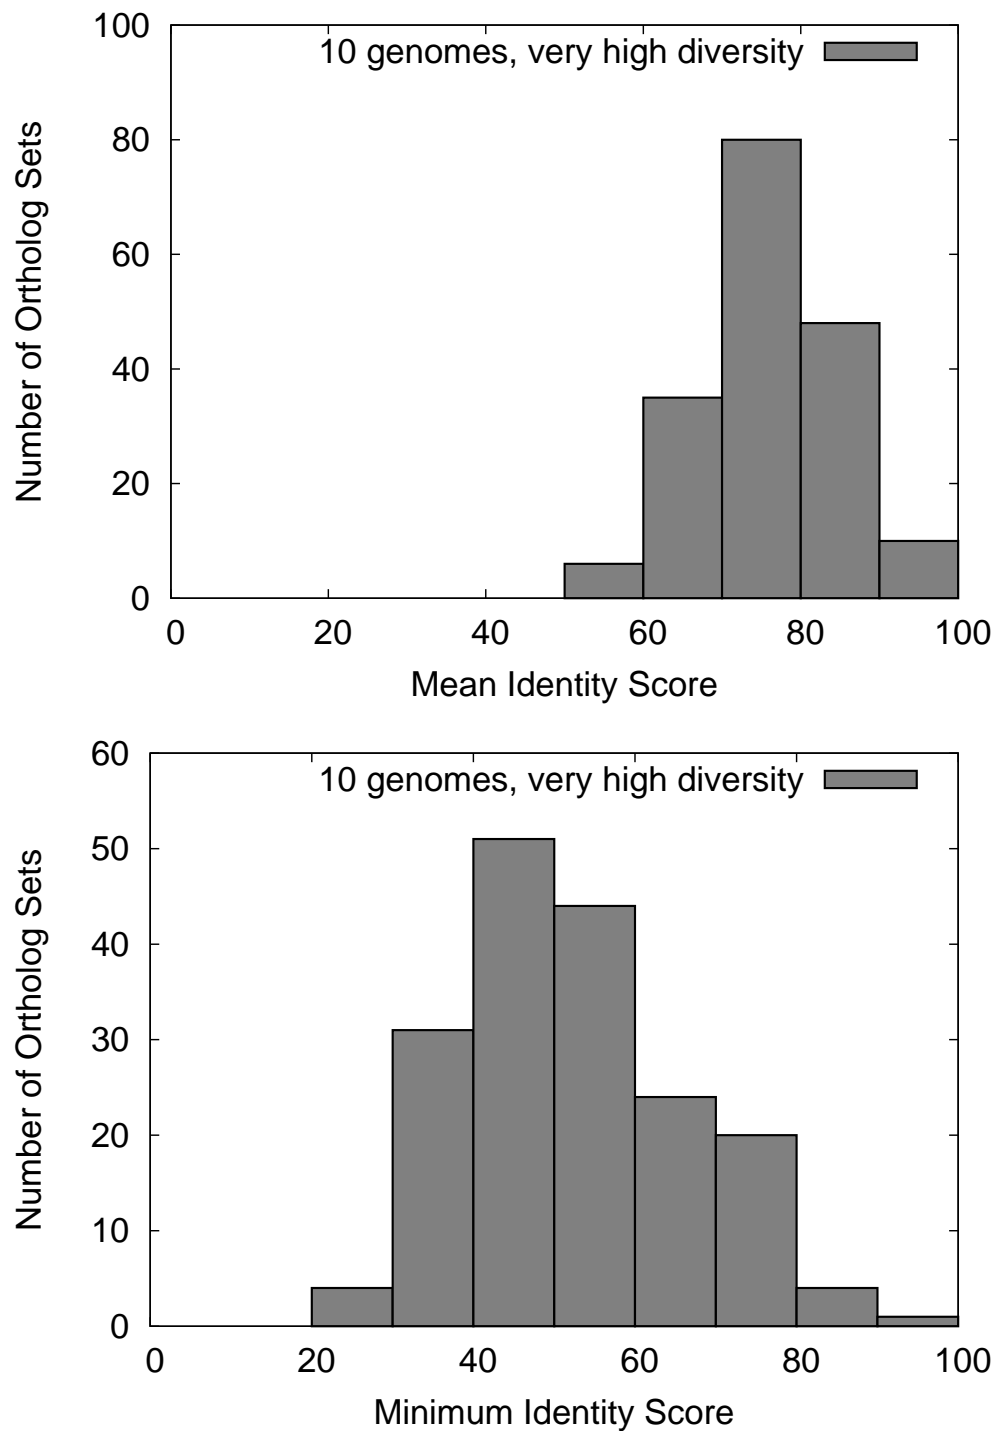

Figure S8: Histogram of mean (top) and minimum (bottom) identity score between genes in ortholog sets derived from the very high diversity, 10 genome set.
